# Annals of Oncology

Official Journal of the  
European Society for Medical Oncology

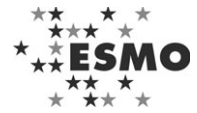

## Volume 18, 2007 Supplement 12

Update on molecular markers as tools for chemotherapy selection in breast cancer

### introduction

*M. J. Piccart-Gebhart*

xii1

New strategies to identify molecular markers predicting chemotherapy activity and toxicity in breast cancer

*A. Di Leo, W. Claudino, D. Colangiuli, S. Bessi, M. Pestrin & L. Biganzoli*

xii8

### symposium articles

Adjuvant chemotherapy – yes or no? Prognostic markers in early breast cancer

*M. J. Piccart-Gebhart & C. Sotiriou*

xii2

Markers predicting clinical benefit in breast cancer from microtubule-targeting agents

*L. Pusztai*

xii15
